# Supplementary material for: Regulatory Role of Retinoic Acid in Male Pregnancy of the Seahorse
Source: PubMed Central journal article supplement (PMC8454549; doi:10.1016/j.xinn.2020.100052), 2020-10-13
Supplement: mmc1.pdf [file mmc1.pdf]

**XINN, Volume 1**

**Supplemental Information**

**Regulatory Role of Retinoic Acid  
in Male Pregnancy of the Seahorse**

**Chunyan Li, Yongxin Li, Geng Qin, Zelin Chen, Meng Qu, Bo Zhang, Xue Han, Xin Wang, Pei-yuan Qian, and Qiang Lin**

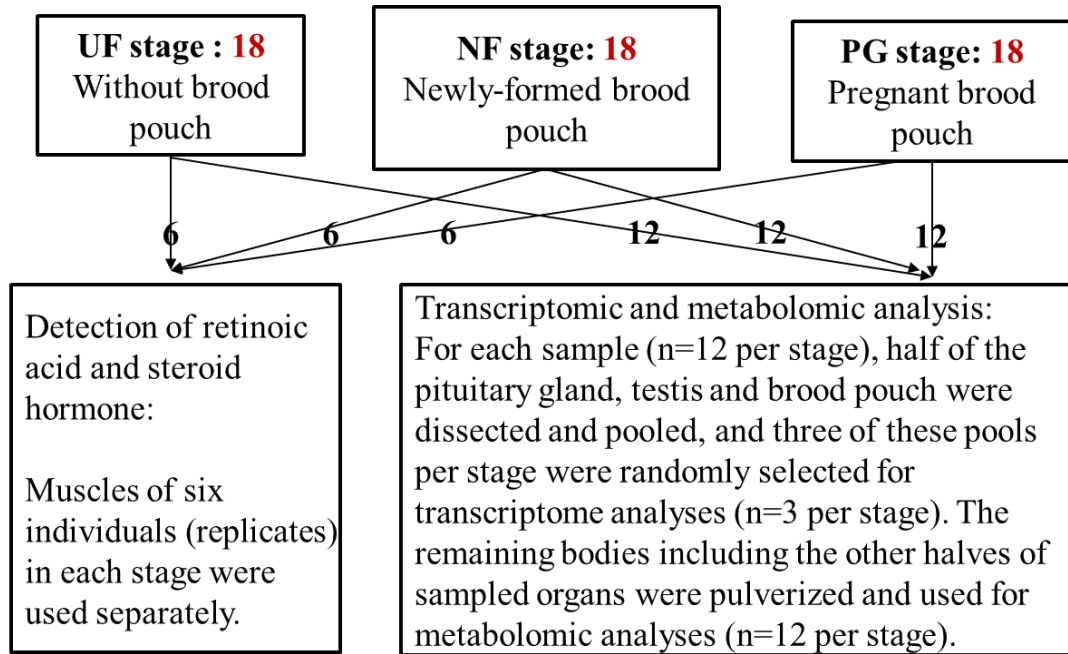

**Figure S1. Illustration of seahorse sampling and using in this study.** Digits in red font indicate total sampling number in each pouch developmental stage and digits on the arrows indicate the sampling number in each stage for different analyses.

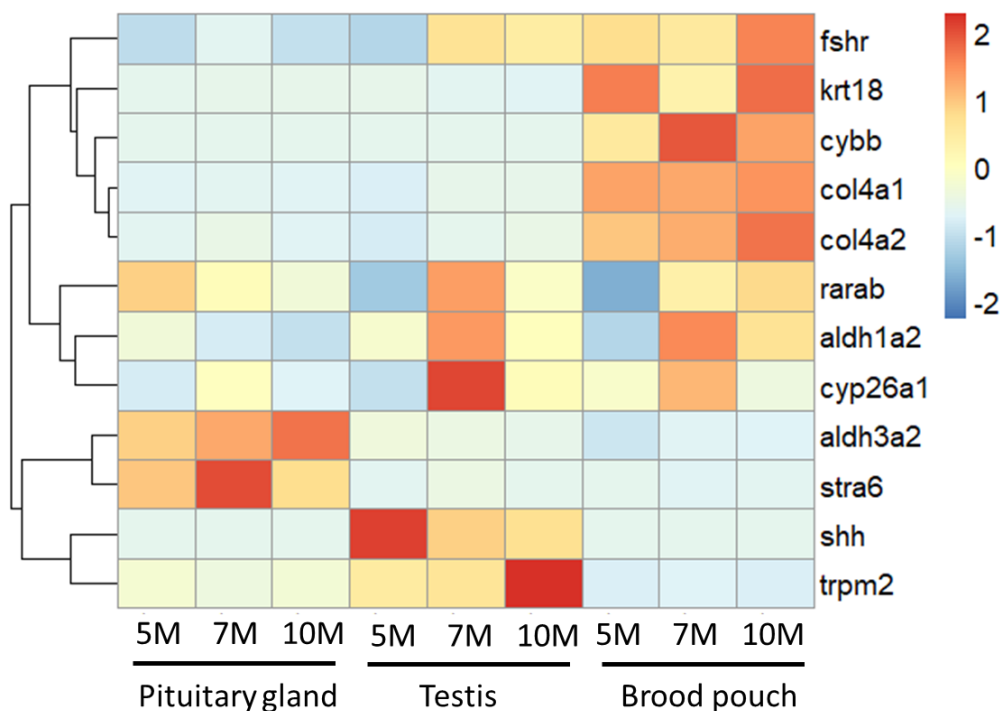

**Figure S2. Heatmap of the spatio-temporal specific expression pattern of the lined seahorse (raw data downloaded from NCBI: SRA392578)<sup>10</sup>.** The x-axis represents different tissues from seahorses at different developmental stages. 5M, 7M and 10M represent 5, 7, and 10-month old male seahorses, respectively. The y-axis stands for RA-related genes.

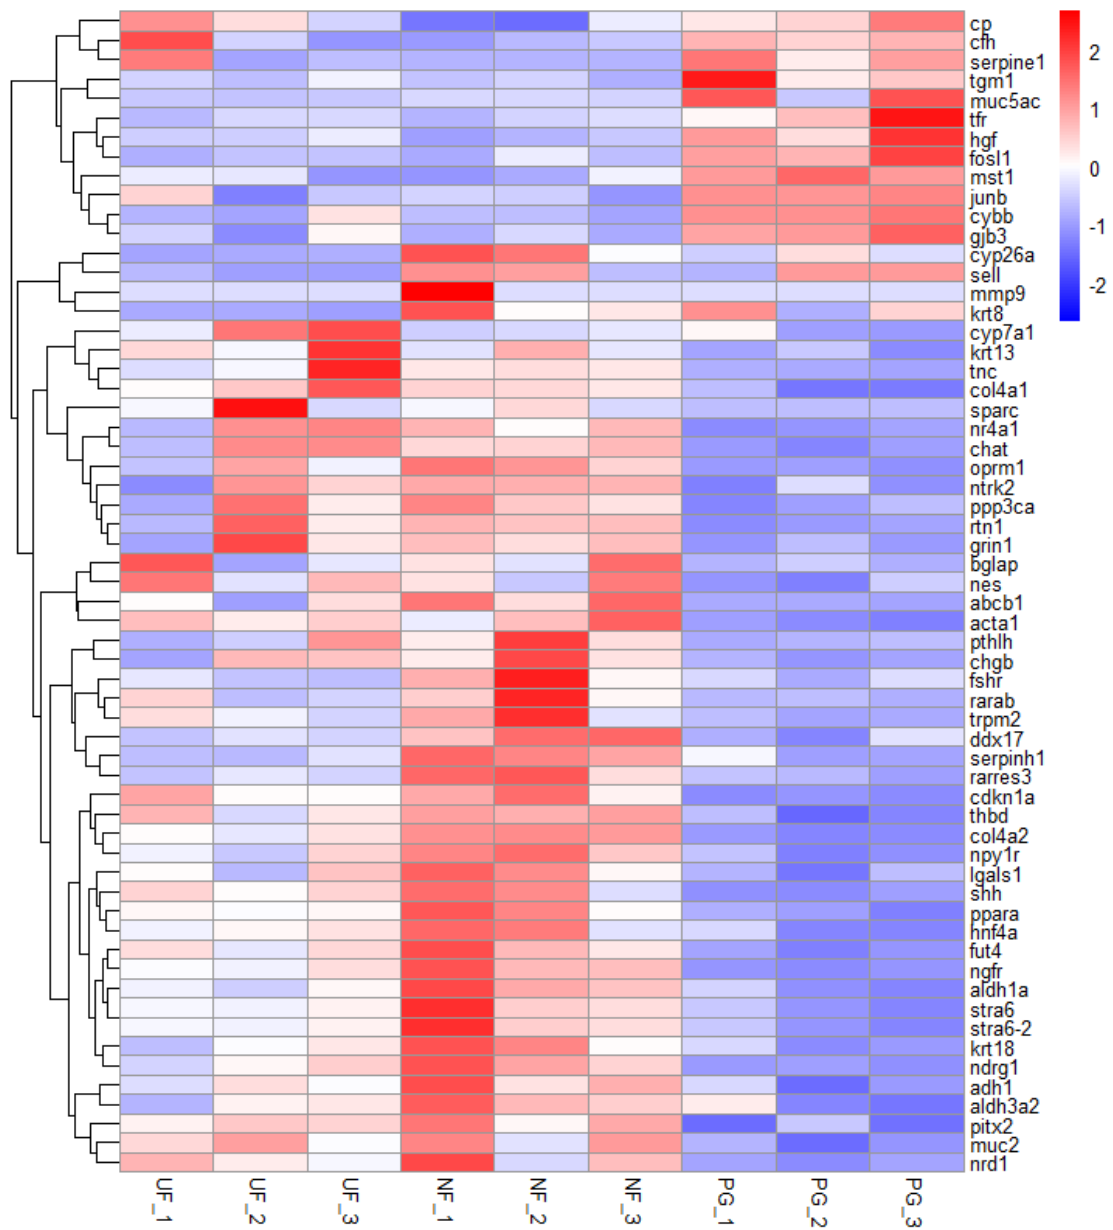

**Figure S3. Heatmap of the expression tendency of RA-related genes across different brood pouch developmental stages.** The x-axis represents samples at different pouch developmental stages and the y-axis represents RA-related genes.

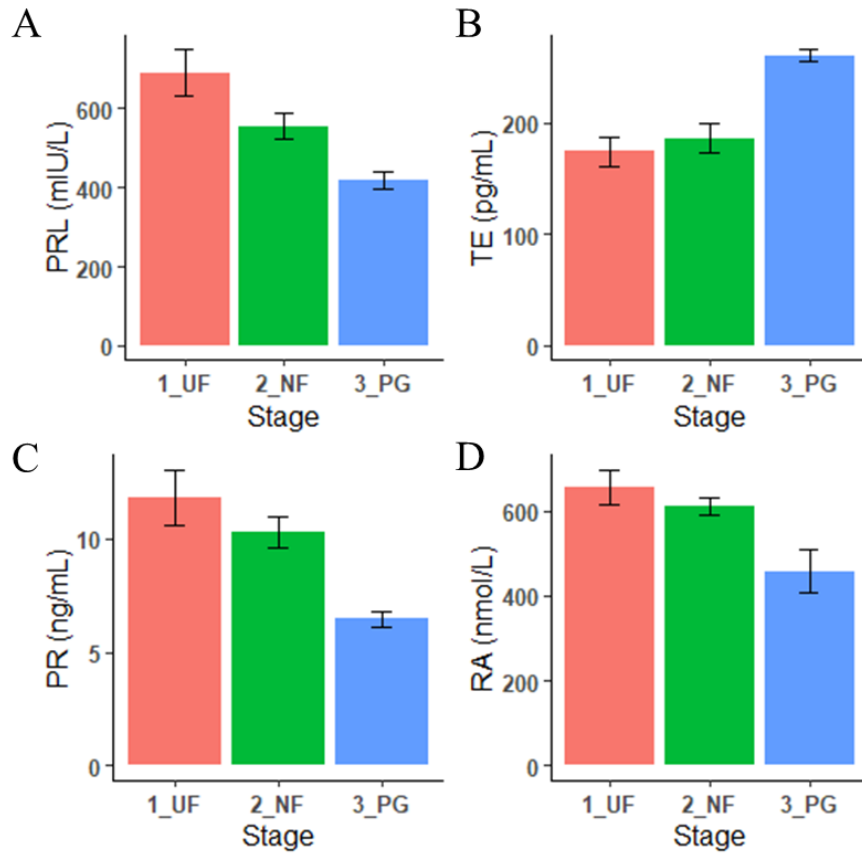

**Figure S4. Histogram of the changing tendency of metabolites across different brood pouch developmental stages.** (A) Prolactin (PRL). (B) Testosterone (TE). (C) Progesterone (PR). (D) Retinoic acid (RA). UF, NF and PG represent stage with unformed brood pouch, newly formed brood pouch, and brood pouch during pregnancy, respectively. Each stage has 6 biological replicates.

**Table S1. Statistics of RNA-seq data.**

| Sample | Before Filter |                |                        |                        |                    |                        | After Filter   |                   |                        |                        |                    |                        |
|--------|---------------|----------------|------------------------|------------------------|--------------------|------------------------|----------------|-------------------|------------------------|------------------------|--------------------|------------------------|
|        | Clean Reads   | Clean Data(bp) | Q20(%)                 | Q30(%)                 | N(%)               | GC(%)                  | HQ Clean Reads | HQ Clean Data(bp) | Q20(%)                 | Q30(%)                 | N(%)               | GC(%)                  |
| UF-1   | 55433344      | 8315001600     | 8185645732<br>(98.44%) | 7982555284<br>(96.00%) | 1007229<br>(0.01%) | 4461782653<br>(53.66%) | 54631848       | 8108123310        | 8030320718<br>(99.04%) | 7863624037<br>(96.98%) | 918014<br>(0.01%)  | 4350122685<br>(53.65%) |
| UF-2   | 56099652      | 8414947800     | 8282624545<br>(98.43%) | 8074368697<br>(95.95%) | 1017741<br>(0.01%) | 4531333984<br>(53.85%) | 55276180       | 8205958945        | 8126175495<br>(99.03%) | 7955076068<br>(96.94%) | 928619<br>(0.01%)  | 4418033431<br>(53.84%) |
| UF-3   | 51482962      | 7722444300     | 7603630977<br>(98.46%) | 7416734146<br>(96.04%) | 938666<br>(0.01%)  | 4097286390<br>(53.06%) | 50769914       | 7539172585        | 7467270036<br>(99.05%) | 7313460225<br>(97.01%) | 854167<br>(0.01%)  | 3999085910<br>(53.04%) |
| NF-1   | 54168874      | 8125331100     | 8003890019<br>(98.51%) | 7811967916<br>(96.14%) | 980087<br>(0.01%)  | 4367090967<br>(53.75%) | 53420786       | 7931695968        | 7858394973<br>(99.08%) | 7700343915<br>(97.08%) | 898286<br>(0.01%)  | 4262219397<br>(53.74%) |
| NF-2   | 50104228      | 7515634200     | 7401672183<br>(98.48%) | 7219849226<br>(96.06%) | 912685<br>(0.01%)  | 4111872365<br>(54.71%) | 49415238       | 7334885200        | 7265645680<br>(99.06%) | 7115247679<br>(97.01%) | 832591<br>(0.01%)  | 4012768481<br>(54.71%) |
| NF-3   | 63606320      | 9540948000     | 9397910315<br>(98.50%) | 9168607511<br>(96.10%) | 1153287<br>(0.01%) | 5163922475<br>(54.12%) | 62750650       | 9317456714        | 9229686531<br>(99.06%) | 9039451025<br>(97.02%) | 1051173<br>(0.01%) | 5042249180<br>(54.12%) |
| PG-1   | 50593674      | 7589051100     | 7476539724<br>(98.52%) | 7297662377<br>(96.16%) | 921982<br>(0.01%)  | 4047183238<br>(53.33%) | 49884558       | 7406457008        | 7337960483<br>(99.08%) | 7190051574<br>(97.08%) | 840100<br>(0.01%)  | 3949079228<br>(53.32%) |
| PG-2   | 54550622      | 8182593300     | 8059733175<br>(98.50%) | 7859634143<br>(96.05%) | 988112<br>(0.01%)  | 4495487557<br>(54.94%) | 53757744       | 7984664108        | 7907972478<br>(99.04%) | 7740980926<br>(96.95%) | 901618<br>(0.01%)  | 4386408360<br>(54.94%) |
| PG-3   | 52753606      | 7913040900     | 7803846435<br>(98.62%) | 7625778800<br>(96.37%) | 962820<br>(0.01%)  | 4253833323<br>(53.76%) | 52054896       | 7733211233        | 7665280678<br>(99.12%) | 7516496768<br>(97.20%) | 877281<br>(0.01%)  | 4156630698<br>(53.75%) |

**Table S2. Reads mapping result of RNA-seq data.**

| Sample | Mapped to rRNA Database |                     | Mapped to the genome of <i>H. erectus</i> |                       |               |
|--------|-------------------------|---------------------|-------------------------------------------|-----------------------|---------------|
|        | HQ Clean Reads          | Unmapped Reads      | Unique Mapped Reads                       | Multiple Mapped reads | Mapping Ratio |
| UF-1   | 54631848                | 54606142 ( 99.95% ) | 43533947<br>(79.72%)                      | 3735956<br>(6.84%)    | 0.8657        |
| UF-2   | 55276180                | 55253848 ( 99.96% ) | 44965824<br>(81.38%)                      | 3697338<br>(6.69%)    | 0.8807        |
| UF-3   | 50769914                | 50735808 ( 99.93% ) | 40973761<br>(80.76%)                      | 2915644<br>(5.75%)    | 0.8651        |
| NF-1   | 53420786                | 53397646 ( 99.96% ) | 43047014<br>(80.62%)                      | 3228906<br>(6.05%)    | 0.8666        |
| NF-2   | 49415238                | 49401256 ( 99.97% ) | 40713409<br>(82.41%)                      | 2944380<br>(5.96%)    | 0.8837        |
| NF-3   | 62750650                | 62727472 ( 99.96% ) | 51050593<br>(81.38%)                      | 4091784<br>(6.52%)    | 0.8791        |
| PG-1   | 49884558                | 49872392 ( 99.98% ) | 40594041<br>(81.40%)                      | 2989508<br>(5.99%)    | 0.8739        |
| PG-2   | 53757744                | 53751606 ( 99.99% ) | 42278993<br>(78.66%)                      | 4502458<br>(8.38%)    | 0.8703        |
| PG-3   | 52054896                | 52044182 ( 99.98% ) | 41780335<br>(80.28%)                      | 3752182<br>(7.21%)    | 0.8749        |

**Table S3. Annotation of transcripts identified from RNA-seq data.**

| <b>Sample Name</b> | <b>Known Gene Number</b> |                | <b>New Gene Number</b> |      | <b>All Gene Number</b> |       |
|--------------------|--------------------------|----------------|------------------------|------|------------------------|-------|
| UF-1               | 15673 (75.39%)           |                | 3016                   |      | 18689                  |       |
| UF-2               | 16019 (77.06%)           | 16966 (81.61%) | 3076                   | 3246 | 19095                  | 20212 |
| UF-3               | 15934 (76.65%)           |                | 3071                   |      | 19005                  |       |
| NF-1               | 16283 (78.33%)           |                | 3158                   |      | 19441                  |       |
| NF-2               | 16164 (77.76%)           | 17233 (82.90%) | 3115                   | 3289 | 19279                  | 20522 |
| NF-3               | 16266 (78.25%)           |                | 3130                   |      | 19396                  |       |
| PG-1               | 15607 (75.08%)           |                | 2964                   |      | 18571                  |       |
| PG-2               | 15622 (75.15%)           | 16812 (80.87%) | 2945                   | 3177 | 18567                  | 19989 |
| PG-3               | 15842 (76.21%)           |                | 3027                   |      | 18869                  |       |

**Table S4. Gene abundance showed by Fragments per million mapped reads (FPKM) (Excel Table).**

**Table S5. Differentially expressed genes (DEGs) identified for the brood pouch formation process (Excel Table).**

**Table S6. Differentially expressed genes (DEGs) identified for the pregnant process of brood pouch (Excel Table).**

**Table S7. Gene ontology (GO) enrichment analysis of differentially expressed genes (DEGs) identified for the brood pouch formation process (Excel Table).**

**Table S8. Gene ontology (GO) enrichment analysis of differentially expressed genes (DEGs) identified for the pregnancy process (Excel Table).**

**Table S9. Kyoto encyclopedia of genes and genomes (KEGG) enrichment analysis of differentially expressed genes (DEGs) identified for the brood pouch formation process (Excel Table).**

**Table S10. Kyoto encyclopedia of genes and genomes (KEGG) enrichment analysis of differentially expressed genes (DEGs) identified for the pregnancy process (Excel Table).**



**Table S11. Expression pattern of differentially expressed genes (DEGs) relevant to retinoic acid synthesis and signaling in *H. erectus*.**

| Gene Symbol | UF-1    | UF-2    | UF-3    | NF-1   | NF-2    | NF-3   | PG-1   | PG-2   | PG-3   |
|-------------|---------|---------|---------|--------|---------|--------|--------|--------|--------|
| adh1        | 84.65   | 117.28  | 99      | 188.98 | 115.31  | 138.59 | 81     | 26.91  | 50.56  |
| aldh1a      | 57.58   | 45.86   | 65.34   | 124.46 | 90.35   | 82.41  | 46.1   | 24.61  | 19.94  |
| cyp26a      | 1.04    | 1.37    | 2.09    | 27.44  | 24.15   | 9.83   | 5.16   | 13.51  | 6.64   |
| aldh3a2     | 8.7     | 18.69   | 19.47   | 35.13  | 24.98   | 22.84  | 18.92  | 3.79   | 2.11   |
| stra6       | 17.38   | 16.47   | 20.35   | 44.9   | 24.56   | 22.73  | 11.35  | 5.08   | 3      |
| rarab       | 0.85    | 0.24    | 0.34    | 0.89   | 1.85    | 0.63   | 0.21   | 0.23   | 0.15   |
| fut4        | 10.84   | 7.79    | 11.29   | 19.27  | 12.93   | 10.37  | 3.74   | 1.81   | 2.9    |
| tgm1        | 3.28    | 2.76    | 4.1     | 2.9    | 3.23    | 2.4    | 10.48  | 4.86   | 5.9    |
| bglap       | 37.91   | 0.76    | 9.97    | 17.74  | 9.74    | 34.76  | 2.5    | 6.12   | 2.13   |
| cyp7a1      | 39.06   | 90.88   | 105.45  | 27.67  | 32.44   | 36.93  | 46.79  | 12.99  | 11.91  |
| pitx2       | 2.16    | 2.59    | 2.52    | 3.51   | 2.1     | 2.98   | 0.37   | 1.43   | 0.43   |
| fshr        | 11.35   | 7.49    | 7.11    | 21.86  | 37.11   | 14.49  | 9.76   | 4.82   | 10.22  |
| sparc       | 0.31    | 1.78    | 0.15    | 0.32   | 0.6     | 0.15   | 0      | 0      | 0      |
| mmp9        | 0       | 0       | 0       | 1.95   | 0       | 0      | 0      | 0      | 0      |
| hgf         | 7.46    | 7.56    | 9.3     | 5.14   | 6.31    | 7.31   | 15.87  | 12.03  | 21.28  |
| ppara       | 14.86   | 14.16   | 14.8    | 25.95  | 22.68   | 14.59  | 9.08   | 8.13   | 5.8    |
| junb        | 26.03   | 9.07    | 16.51   | 17.54  | 16.59   | 11.03  | 32.21  | 32.07  | 33.26  |
| tnc         | 1.12    | 1.52    | 4.96    | 1.97   | 2.18    | 2.03   | 0.43   | 0.33   | 0.27   |
| pthlh       | 8.43    | 10.64   | 21.29   | 15.26  | 27.63   | 16.37  | 7.87   | 8.68   | 9.53   |
| shh         | 4.64    | 3.78    | 4.66    | 7.08   | 6.36    | 2.85   | 1.16   | 1.02   | 1.54   |
| hnf4a       | 25.72   | 28.82   | 30.99   | 48.16  | 45.42   | 23.89  | 22.01  | 11.37  | 11.05  |
| ngfr        | 4.9     | 4.62    | 6.12    | 11.08  | 7.43    | 7.29   | 1.34   | 0.99   | 1.4    |
| col4a1      | 7.11    | 8.84    | 12.87   | 8.58   | 8.42    | 7.94   | 4.8    | 2.35   | 2.56   |
| col4a2      | 4.14    | 3.5     | 4.76    | 6.96   | 7.14    | 6.74   | 1.42   | 0.88   | 0.98   |
| krt13       | 60.22   | 46.14   | 109.16  | 40.73  | 72.07   | 42.51  | 22.05  | 32.92  | 15.61  |
| krt8        | 49.28   | 48.92   | 42.01   | 202.41 | 100.03  | 112.3  | 166.28 | 51.96  | 125.23 |
| thbd        | 12.6    | 7.71    | 10.51   | 13.56  | 12.91   | 13.44  | 6.73   | 3.04   | 4.43   |
| serpinh1    | 4.97    | 4.8     | 6.34    | 13.1   | 11.91   | 10.67  | 7.15   | 3.84   | 4.02   |
| muc2        | 19.39   | 23.84   | 15.93   | 25.97  | 13.75   | 24     | 10.27  | 4.57   | 7.58   |
| cfh         | 1290.73 | 471.41  | 233.17  | 247.99 | 371.93  | 430.77 | 911.22 | 799.01 | 902.48 |
| serpine1    | 23.06   | 4.66    | 6.49    | 5.6    | 5.74    | 5.72   | 23.74  | 13.7   | 20.14  |
| muc5ac      | 0.15    | 0       | 0.11    | 1.37   | 1.12    | 0.94   | 14.71  | 0.28   | 14.99  |
| cybb        | 22.04   | 17.98   | 47.17   | 24.64  | 23.95   | 17.86  | 68.28  | 67.48  | 74.41  |
| abcb1       | 4.72    | 2.14    | 5.59    | 8.25   | 5.57    | 8.68   | 2.49   | 2.46   | 2.29   |
| oprml       | 0.69    | 2.06    | 1.09    | 2.45   | 2.18    | 1.63   | 0.29   | 0.32   | 0.2    |
| rtn1        | 8.87    | 23.76   | 14.74   | 18.5   | 17.17   | 17.7   | 5.79   | 6.67   | 7.54   |
| nr4a1       | 1.32    | 3.27    | 3.39    | 2.86   | 2.12    | 2.85   | 0.78   | 0.92   | 1.08   |
| chat        | 0.42    | 1.28    | 1.28    | 0.91   | 0.92    | 1.05   | 0.24   | 0.14   | 0.26   |
| ntkr2       | 1.85    | 6.45    | 5.2     | 6.03   | 6       | 5.81   | 1.61   | 3.52   | 1.99   |
| nes         | 4.78    | 2.48    | 3.84    | 3.28   | 2.12    | 4.69   | 1.42   | 1.12   | 2.24   |
| krt18       | 134.49  | 205.12  | 235.39  | 400.71 | 341.68  | 210.25 | 163.74 | 73.98  | 92.95  |
| ndrg1       | 276.54  | 393.75  | 489.9   | 773.48 | 583.37  | 478.2  | 151.13 | 157.03 | 127.83 |
| ddx17       | 17.83   | 21.31   | 19.18   | 30.86  | 40.76   | 41.7   | 15.32  | 10.8   | 21.26  |
| rarrs3      | 11.2    | 21.96   | 16.86   | 74.12  | 78.37   | 39.74  | 11.41  | 8.11   | 0.94   |
| sell        | 5.45    | 0.09    | 0.26    | 45.72  | 42.15   | 6.75   | 4.56   | 43.35  | 43.52  |
| grin1       | 4.21    | 23.42   | 11.99   | 15     | 12.75   | 14.97  | 3.08   | 5.82   | 3.38   |
| acta1       | 1384.76 | 1077.68 | 1307.49 | 844.56 | 1410.93 | 2036   | 309.78 | 159.89 | 106.18 |
| cdkn1a      | 51.09   | 36.35   | 36.25   | 49.71  | 59.88   | 38.64  | 17.38  | 18.93  | 17.43  |
| fosl1       | 0.79    | 1.46    | 1.52    | 0.58   | 2.85    | 1.27   | 6.75   | 6.19   | 10.13  |
| gjb3        | 9.07    | 4.74    | 12.19   | 7.06   | 9.39    | 6.63   | 17.03  | 17.75  | 21.07  |
| stra6       | 17.38   | 16.47   | 20.35   | 44.9   | 24.56   | 22.73  | 11.35  | 5.08   | 3      |
| tpm2        | 0.6     | 0.38    | 0.26    | 0.82   | 1.34    | 0.32   | 0.17   | 0.05   | 0.07   |
| cp          | 726.76  | 570.4   | 416.66  | 240.26 | 217.74  | 466.66 | 555.05 | 586.16 | 760.75 |
| tfr         | 79.09   | 143.9   | 140.3   | 70.77  | 135.45  | 156.8  | 238.34 | 351.67 | 699.34 |
| chgb        | 1.05    | 4.53    | 4.25    | 3.39   | 6.94    | 3.62   | 1.3    | 0.71   | 1.07   |
| nrd1        | 0.32    | 0.23    | 0.18    | 0.51   | 0.13    | 0.31   | 0.04   | 0      | 0.04   |
| npylr       | 7.03    | 5.39    | 9.27    | 12.4   | 13.45   | 9.8    | 5.28   | 2.45   | 3.12   |
| lgals1      | 46.89   | 27.6    | 60.85   | 85.68  | 76.15   | 48.43  | 26.34  | 10.93  | 29.2   |
| ppp3ca      | 2.8     | 9.36    | 5.68    | 8.73   | 6.84    | 6.1    | 1.73   | 2.48   | 3.38   |
| mst1        | 100.81  | 98.87   | 52.63   | 52.79  | 65.37   | 105.44 | 165.55 | 195.93 | 166.3  |

**Table S12. Expression pattern of differentially expressed genes (DEGs) relevant to retinoic acid synthesis and signaling during the pregnant process of *H. abdominalis*.**

| Gene Symbol | Gene ID            | g2 (Fold Chang) | P value   | Comparison           |
|-------------|--------------------|-----------------|-----------|----------------------|
| aldh9a1b    | ENSDARG00000037061 | -2.902          | 0.04606   | latepreg vs nonpreg  |
| rdh10a      | ENSDARG00000058730 | 2.158           | 0.0000415 | latepreg vs nonpreg  |
| cyp26a1     | ENSDARG00000033999 | -2.319          | 0.001779  | midpreg vs nonpreg   |
| rxrgb       | ENSDARG00000004697 | 2.857           | 0.0000616 | midpreg vs nonpreg   |
| rxrgb       | ENSDARG00000004697 | 1.861           | 0.04656   | earlypreg vs nonpreg |
| crabp2a     | ENSDARG00000040923 | -1.16           | 0.04778   | latepreg vs nonpreg  |
| fshr        | ENSDARG00000071494 | -1.406          | 0.007188  | midpreg vs nonpreg   |
| hsd11b2     | ENSDARG00000001975 | -3.572          | 0.0003074 | latepreg vs nonpreg  |
| hsd11b2     | ENSDARG00000001975 | -3.152          | 0.0001863 | midpreg vs nonpreg   |
| hsd11b2     | ENSDARG00000001975 | -2.351          | 0.01375   | earlypreg vs nonpreg |
| grasp       | ENSDARG00000000588 | -1.624          | 0.01904   | earlypreg vs nonpreg |
| itgb4       | ENSDARG00000028507 | -1.403          | 0.03008   | midpreg vs nonpreg   |
| tgfa        | ENSDARG00000053939 | -5.856          | 0.03533   | latepreg vs nonpreg  |
| abcc2       | ENSDARG00000014031 | -1.76           | 0.03807   | latepreg vs nonpreg  |
| plat        | ENSDARG00000062707 | -2.2            | 0.005742  | latepreg vs nonpreg  |
| plat        | ENSDARG00000062707 | -1.958          | 0.009609  | midpreg vs nonpreg   |
| mgp         | ENSDARG00000086189 | -1.684          | 0.000028  | latepreg vs nonpreg  |
| col4a2      | ENSDARG00000020781 | 1.217           | 0.02842   | latepreg vs nonpreg  |
| krt18       | ENSDARG00000018404 | 3.176           | 0.007966  | latepreg vs nonpreg  |
| krt18       | ENSDARG00000018404 | 1.224           | 0.02134   | midpreg vs nonpreg   |
| krt18       | ENSDARG00000018404 | 1.379           | 0.01653   | earlypreg vs nonpreg |
| col4a1      | ENSDARG00000055009 | 1.329           | 0.008908  | latepreg vs nonpreg  |
| edn1        | ENSDARG00000036912 | 3.903           | 0.0007164 | latepreg vs nonpreg  |
| krt4        | ENSDARG00000017624 | 1.381           | 0.04903   | latepreg vs nonpreg  |
| krt4        | ENSDARG00000017624 | 1.274           | 0.04448   | midpreg vs nonpreg   |
| acta2       | ENSDARG00000045180 | 2.834           | 0.02364   | latepreg vs nonpreg  |
| meox1       | ENSDARG00000007891 | 3.492           | 0.02379   | latepreg vs nonpreg  |
| meox1       | ENSDARG00000007891 | 7.202           | 0.04448   | midpreg vs nonpreg   |
| meox1       | ENSDARG00000007891 | 1.595           | 0.04963   | earlypreg vs nonpreg |
| cetp        | ENSDARG00000030872 | 7.602           | 0.0005293 | midpreg vs nonpreg   |
| apoa2       | ENSDARG00000015866 | 6.228           | 0.0000012 | latepreg vs nonpreg  |
| apoa2       | ENSDARG00000015866 | 4.774           | 0.0008131 | midpreg vs nonpreg   |
| nr4a3       | ENSDARG00000055854 | 4.601           | 0.0008106 | earlypreg vs nonpreg |

**Table S13. Relative quantity of annotated metabolites across different brood pouch developmental stages (Excel Table).**

**Table S14. Significant different metabolites (SDMs) identified for the brood pouch formation process (Excel Table).**

**Table S15. Significantly different metabolites (SDMs) identified for the pregnancy process (Excel Table).**

**Table S16. Kyoto encyclopedia of genes and genomes (KEGG) enrichment analysis of significantly different metabolites (SDMs) identified for the brood pouch formation process (Excel Table).**

**Table S17. Kyoto encyclopedia of genes and genomes (KEGG) enrichment analysis of significantly different metabolites (SDMs) identified for the pregnancy process (Excel Table).**

**Table S18. Co-enriched pathways of both transcriptomics and metabolomics for the brood pouch formation process.**

| PathA                             | PathB                      | PathC                                             | Hits (Transcripts)                    | No. Hits (Transcripts) | Hits (Metabolites)                                                                                           | No. Hits (Metabolites) |
|-----------------------------------|----------------------------|---------------------------------------------------|---------------------------------------|------------------------|--------------------------------------------------------------------------------------------------------------|------------------------|
| Metabolism                        | Amino acid metabolism      | Histidine metabolism                              | XLOC_006719                           | 1                      | L-Histidine cpd:C00135;<br>1-Methylhistidine<br>cpd:C01152                                                   | 2                      |
| Metabolism                        | Amino acid metabolism      | Tryptophan metabolism                             | H.erectus.017462                      | 1                      | L-Tryptophan<br>cpd:C00078                                                                                   | 1                      |
| Metabolism                        | Carbohydrate<br>metabolism | Amino sugar and<br>nucleotide sugar<br>metabolism | H.erectus.010479                      | 1                      | D-Glucose cpd:C00031                                                                                         | 1                      |
| Metabolism                        | Lipid metabolism           | Arachidonic acid<br>metabolism                    | H.erectus.008667                      | 1                      | Arachidonic acid<br>cpd:C00219; 5(S)-<br>Hydroperoxyeicosatetraen<br>oic acid cpd:C05356                     | 2                      |
| Metabolism                        | Lipid metabolism           | Primary bile acid<br>biosynthesis                 | H.erectus.000227                      | 1                      | Taurine cpd:C00245                                                                                           | 1                      |
| Metabolism                        | Others                     | Purine metabolism                                 | H.erectus.011448                      | 1                      | Inosine cpd:C00294; Uric<br>acid cpd:C00366                                                                  | 2                      |
| Genetic Information<br>Processing | Others                     | Aminoacyl-tRNA<br>biosynthesis                    | H.erectus.004816;<br>H.erectus.009845 | 2                      | L-Phenylalanine<br>cpd:C00079; L-Valine<br>cpd:C00183; L-<br>Tryptophan cpd:C00078;<br>L-Tyrosine cpd:C00082 | 4                      |

**Table S19. Co-enriched pathways of both transcriptomics and metabolomics for the pregnancy process (Excel Table).**

**Table S20. Changes of retinoic acid, prolactin, progesterone, and testosterone across different brood pouch developmental stages.**

| Stage | Replicates | Muscle      |             |             |             |
|-------|------------|-------------|-------------|-------------|-------------|
|       |            | PRL (mIU/L) | PG (ng/mL)  | T (pg/mL)   | RA (nmol/L) |
| PG    | PG1        | 407.2874183 | 6.529101604 | 248.6522103 | 375.8543835 |
|       | PG4        | 461.3114108 | 7.291854716 | 257.3165847 | 381.5882977 |
|       | PG5        | 470.6398781 | 5.704263937 | 260.838688  | 594.7624861 |
|       | PG8        | 395.2820866 | 6.33989153  | 273.6591443 | 481.1035644 |
|       | PG10       | 357.1570467 | 8.020609142 | 243.5451605 |             |
| NF    | NF1        | 565.3035408 | 12.21279485 | 157.8876064 | 549.9105349 |
|       | NF2        | 523.365997  | 12.17879616 | 161.1279415 | 585.9704843 |
|       | NF3        | 508.1970981 | 9.860972754 | 179.7246473 | 666.6275442 |
|       | NF4        | 518.1745022 | 10.08713792 | 162.2550146 | 678.3502133 |
|       | NF5        | 715.0457185 | 9.111523476 | 224.244034  | 592.3415001 |
|       | NF6        | 498.3008112 | 8.360595994 | 229.8793994 | 589.7930938 |
| UF    | UF1        | 641.5536204 | 11.98515148 | 162.0084673 | 593.2334423 |
|       | UF2        | 839.4793591 | 9.634807588 | 200.3641731 | 644.0741483 |
|       | UF3        | 567.9804053 | 13.86099198 | 159.3668898 | 731.4844849 |
|       | UF4        | 712.5310882 | 10.87058588 | 244.7778966 |             |

**Table S21. Correlation analysis between differentially expressed genes (DEGs) and significantly different metabolites (SDMs) identified for the brood pouch formation process (Excel Table).**

**Table S22. Correlation analysis between differentially expressed genes (DEGs) and significantly different metabolites (SDMs) identified for pregnancy process (Excel Table).**
